# Supplementary material for: Uptake, Translocation, and Fate of Carcinogenic Aristolochic Acid in Typical Vegetables in Soil−Plant Systems
Source: MDPI journal article supplement (doi:10.3390/molecules27238271), 2022-11-27
Supplement: s1 [file s1]

# Uptake, Translocation, and Fate of Carcinogenic Aristolochic Acid in Typical Vegetables in Soil–Plant Systems

Jinghe Zhang <sup>1,2</sup>, Yinan Wang <sup>1,\*</sup>, Changhong Wang <sup>2</sup>, Kan Li <sup>3</sup>, Weifang Tang <sup>3</sup>, Jing Sun <sup>2</sup> and Xikui Wang <sup>2,\*</sup>

<sup>1</sup> Key Laboratory of Fine Chemicals in Universities of Shandong, Jinan Engineering Laboratory for Multi-Scale Functional Materials, School of Chemistry and Chemical Engineering, Qilu University of Technology (Shandong Academy of Sciences), Jinan 250353, China

<sup>2</sup> School of Environmental Science and Engineering, Qilu University of Technology (Shandong Academy of Sciences), Jinan 250353, China

<sup>3</sup> School of Computer Science and Technology, Qilu University of Technology (Shandong Academy of Sciences), Jinan 250353, China

\* Correspondence: wangyn@qlu.edu.cn (Y.W.); xikuiwang@126.com or xk\_wang@qlu.edu.cn (X.W.)

**Table S1.** MRM transitions of AAs.

|              | Quantification ion transition | Collision energy 1 (eV) | Confirmatory ion transition | Collision energy 2 (eV) |
|--------------|-------------------------------|-------------------------|-----------------------------|-------------------------|
| <b>AA I</b>  | 359→298                       | −10                     | 359→296                     | −10                     |
|              |                               |                         | 359→324                     | −13                     |
| <b>AA II</b> | 329→268                       | −7                      | 329→238                     | −10                     |
|              |                               |                         | 329→294                     | −20                     |

**Table S2.** Linear regression parameters of the calibration curves of the developed HPLC-MS/MS method for the determination of AAs in plant.

|                             | Lettuce |         | Celery  |         | Tomato  |         |
|-----------------------------|---------|---------|---------|---------|---------|---------|
|                             | AA I    | AA II   | AA I    | AA II   | AA I    | AA II   |
| <b>Linear range (ng/mL)</b> | 50–1000 | 50–1000 | 50–1000 | 50–1000 | 50–1000 | 50–1000 |
| <b>Slope</b>                | 829.78  | 158.21  | 632.53  | 100.06  | 464.62  | 57.529  |
| <b>Intercept</b>            | 2483.9  | −2722.1 | −9219.4 | −1311.5 | −11408  | −2009.8 |
| <b>R<sup>2</sup></b>        | 0.9990  | 0.9993  | 0.9970  | 0.9987  | 0.9989  | 0.9999  |

**Table S3.** Linear regression parameters of the calibration curves of the developed HPLC-MS/MS method for the determination of AA I and AA II in soil.

|                             | Lettuce and Celery soil |          | Tomato soil |          |
|-----------------------------|-------------------------|----------|-------------|----------|
|                             | AA I                    | AA II    | AA I        | AA II    |
| <b>Linear range (ng/mL)</b> | 100~1000                | 100~1000 | 100~1000    | 100~1000 |
| <b>Slope</b>                | 1545.6                  | 255.6    | 773.99      | 228.49   |
| <b>Intercept</b>            | −29607                  | 1279.3   | 55989       | −629.47  |
| <b>R<sup>2</sup></b>        | 0.9981                  | 0.9944   | 0.9981      | 0.9986   |

**Table S4.** Limits of detection, intra- and inter-day precision and accuracy of the developed HPLC-MS/MS method for the determination of AA I and AA II in celery.

|             | Precision          |                              |                              | Accuracy                        |        | LOD | LOQ |
|-------------|--------------------|------------------------------|------------------------------|---------------------------------|--------|-----|-----|
|             | Concn added (ng/g) | Intraday <sup>a</sup> (%RSD) | Interday <sup>b</sup> (%RSD) | Concn found <sup>c</sup> (ng/g) | Error  |     |     |
| <b>AA I</b> | 50                 | 1.8%                         | 5.7%                         | 43.2±1.4                        | −13.7% | 2.0 | 6.8 |
|             | 500                | 6.3%                         | 13.3%                        | 521.2±29.2                      | 4.3%   |     |     |

|       |      |       |       |             |       |     |      |
|-------|------|-------|-------|-------------|-------|-----|------|
|       | 1000 | 4.5%  | 7.2%  | 975.0±59.2  | −2.5% |     |      |
| AA II | 50   | 4.0%  | 9.4%  | 48.5±2.0    | −3.1% |     |      |
|       | 500  | 3.9%  | 17.4% | 499.7±20.4  | −0.1% | 8.5 | 28.3 |
|       | 1000 | 11.4% | 15.2% | 1026.2±43.1 | 2.6%  |     |      |

<sup>a</sup>n=5, <sup>b</sup>n=7, <sup>c</sup>n=3.

**Table S5.** Limits of detection, intra- and inter-day precision and accuracy of the developed HPLC-MS/MS method for the determination of AA I and AA II in tomato.

|       | Concn added (ng/g) | Precision                    |                              | Accuracy                        |        | LOD | LOQ  |
|-------|--------------------|------------------------------|------------------------------|---------------------------------|--------|-----|------|
|       |                    | Intraday <sup>a</sup> (%RSD) | Interday <sup>b</sup> (%RSD) | Concn found <sup>c</sup> (µg/g) | Error  |     |      |
| AA I  | 50                 | 2.8%                         | 12.2%                        | 51.6±0.7                        | 3.2%   |     |      |
|       | 500                | 7.1%                         | 12.1%                        | 433.0±28.4                      | −13.4% | 1.7 | 5.5  |
|       | 1000               | 2.6%                         | 3.9%                         | 931.7±45.9                      | −6.8%  |     |      |
| AA II | 50                 | 4.4%                         | 9.8%                         | 52.6±4.4                        | 5.1%   |     |      |
|       | 500                | 2.7%                         | 6.8%                         | 475.4±117.2                     | −4.9%  | 8.8 | 24.4 |
|       | 1000               | 3.8%                         | 11.5%                        | 979.7±42.6                      | −2.0%  |     |      |

<sup>a</sup>n=5, <sup>b</sup>n=7, <sup>c</sup>n=3.

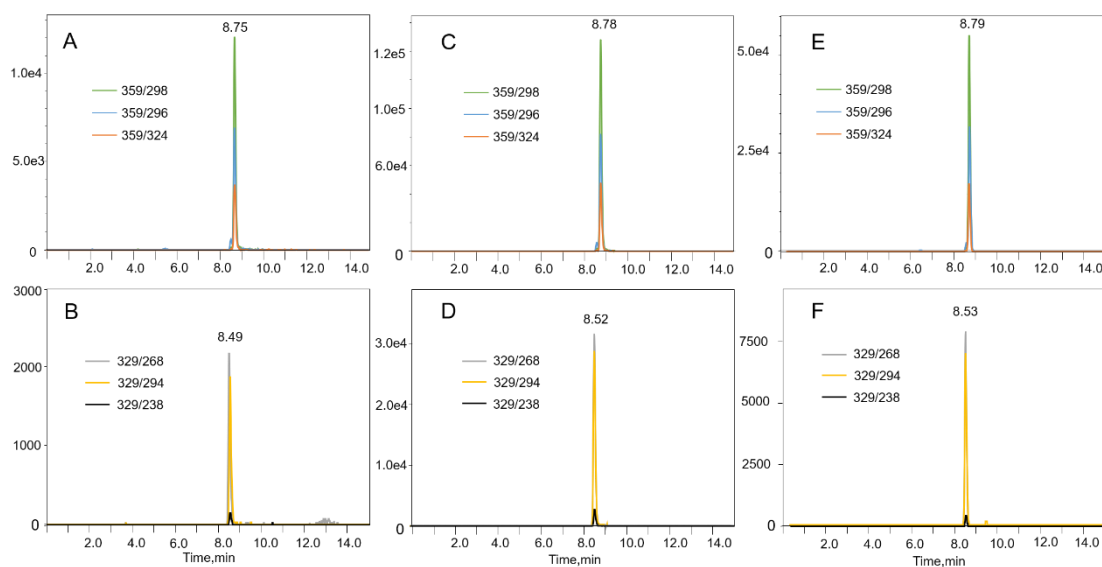

**Figure S1.** Typical LC-MS/MS chromatograms from MRM of AAs in lettuce (A: AA I; B: AA II), celery (C: AA I; D: AA II), and tomato (E: AA I; F: AA II) samples grown in AA-contaminated soil.

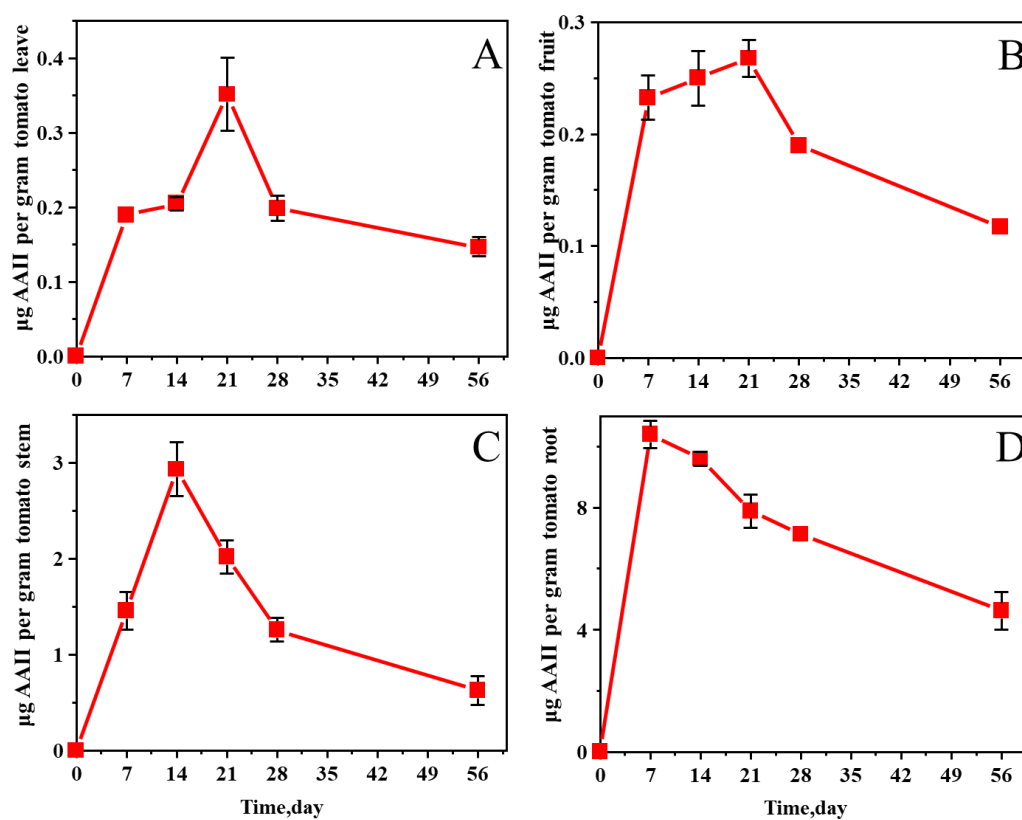

**Figure S2.** Concentration changes of AA II in tomato leaves (A), fruits (B), stems (C), and roots (D) grown in AA-contaminated soil.

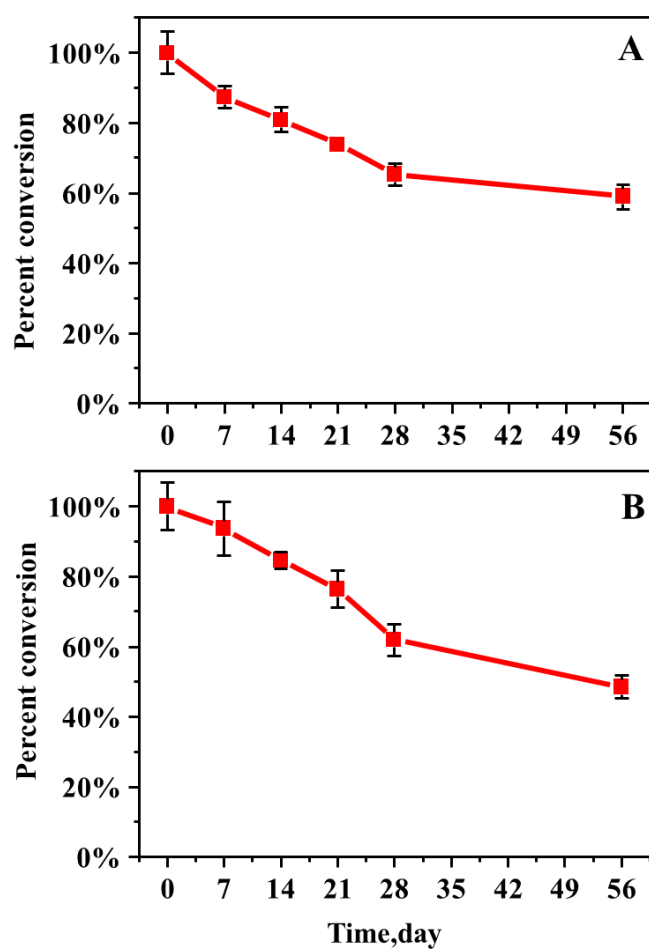

**Figure S3.** Percentage change of AA I (A) and AA II (B) from initial soil concentration in the soil where celery was grown.

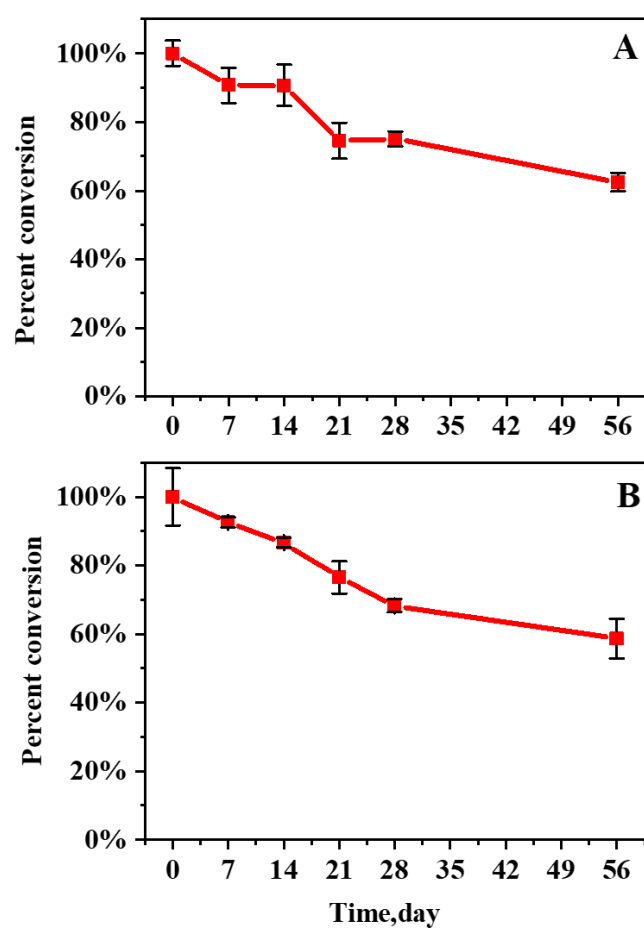

**Figure S4.** Percentage change of AA I (A) and AA II (B) from initial soil concentration in the soil where tomato was grown.

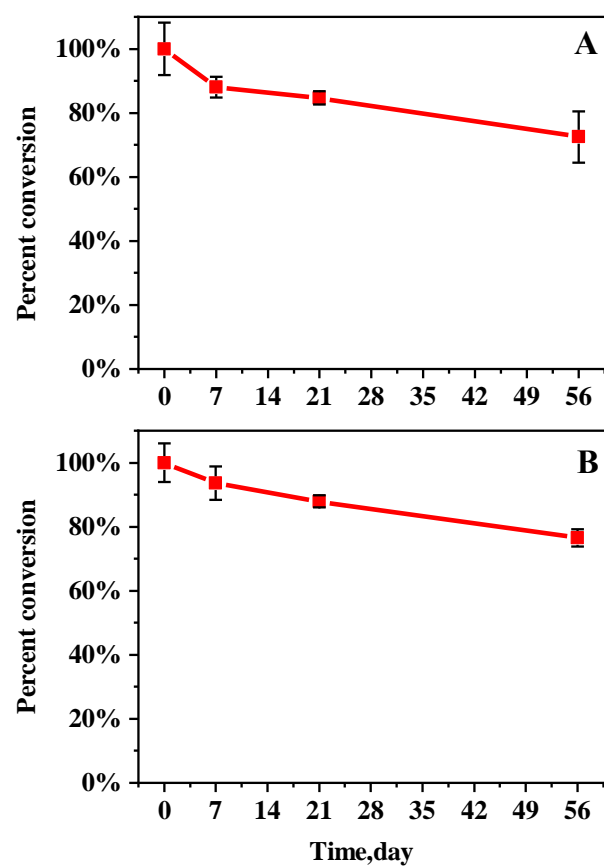

**Figure S5.** Percentage change of AA I (A) and AA II (B) from initial soil concentration in the soil without plant growth.
